# Supplementary material
Source: MDPI journal article supplement (https://www.mdpi.com/2073-445X/12/2/275)
Supplement: s1 [file s1]

**Table S1.** Health condition characteristic of selected defoliated trees in Bielański Forest in Warsaw

| tree ID (Nr from HSD Tree Crown Map for Warsaw)                             | crown tree area (m2) | tree hight (average) | tree hight (max) | ill tree characteristic                                                                            | defoliation (%) |
|-----------------------------------------------------------------------------|----------------------|----------------------|------------------|----------------------------------------------------------------------------------------------------|-----------------|
| <i>Acer sp.</i>                                                             |                      |                      |                  |                                                                                                    |                 |
| 7045550                                                                     | 14,5                 | 5,7                  | 8,0              | broken branches                                                                                    | 68,9            |
| 7049029                                                                     | 16,8                 | 10,8                 | 12,7             | broken branches                                                                                    | 70,0            |
| 7054665                                                                     | 27,0                 | 11,8                 | 17,1             | broken branches                                                                                    | 100,0           |
| 7060010                                                                     | 21,5                 | 4,8                  | 6,5              | broken branches                                                                                    | 90,4            |
| 7060902                                                                     | 17,3                 | 8,4                  | 11,7             | broken branches                                                                                    | 70,7            |
| 7072191                                                                     | 8,0                  | 17,0                 | 18,9             | Roots growing around the trunk                                                                     | 70,3            |
| 7094418                                                                     | 10,5                 | 4,0                  | 6,7              | Roots growing around the trunk, broken branches                                                    | 65,2            |
| 7101545                                                                     | 4,0                  | 12,9                 | 19,7             | Tree inclined, broken branches                                                                     | 74,0            |
| 7108276                                                                     | 14,5                 | 19,8                 | 24,6             | at a height of 2 meters the tree branches into two conductors, broken branches                     | 83,6            |
| 7115283                                                                     | 54,5                 | 14,0                 | 18,1             | at a height of 3 meters the tree branches into two conductors, broken branches                     | 69,1            |
| 7116155                                                                     | 19,5                 | 7,3                  | 10,7             | Roots growing around the trunk, inclined trees, broken branches                                    | 65,3            |
| <i>Alnus sp.</i>                                                            |                      |                      |                  |                                                                                                    |                 |
| 7017022                                                                     | 66,0                 | 11,9                 | 17,4             | roots growing around the trunk, at a height of 3 meters one conductor broken off, broken branches  | 92,6            |
| 7022937                                                                     | 2,8                  | 2,6                  | 3,9              | offshoots at the base of the trunk, roots growing around the trunk, tree inclined, broken branches | 76,1            |
| 7063052                                                                     | 15,5                 | 15,5                 | 19,6             | roots growing around a tree trunk                                                                  | 76,3            |
| <i>Betula sp.</i>                                                           |                      |                      |                  |                                                                                                    |                 |
| 7038804                                                                     | 108,8                | 10,8                 | 16,0             | longitudinal cracks on the trunk                                                                   | 85,4            |
| 7053638                                                                     | 17,3                 | 12,8                 | 21,1             | broken branches                                                                                    | 92,8            |
| 7081048                                                                     | 33,3                 | 14,6                 | 19,9             | a decaying tree                                                                                    | 71,6            |
| 7098337                                                                     | 8,0                  | 14,8                 | 17,1             | rickety tree                                                                                       | 74,4            |
| 7102502                                                                     | 10,8                 | 15,2                 | 22,3             | roots growing around the trunk, broken branches                                                    | 89,0            |
| 7102617                                                                     | 20,0                 | 16,5                 | 21,2             | crack in the stump at a height of 1 meter                                                          | 75,4            |
| 7112352                                                                     | 14,3                 | 14,6                 | 18,0             | broken branches                                                                                    | 75,4            |
| 7114135                                                                     | 14,5                 | 13,8                 | 20,2             | regrowths at the base of the trunk, broken branches                                                | 74,3            |
| <i>Carpinus sp.</i>                                                         |                      |                      |                  |                                                                                                    |                 |
| 7092105                                                                     | 26,8                 | 14,8                 | 20,9             | broken branches                                                                                    | 66,9            |
| fruit trees ( <i>Malus sp.</i> , <i>Prunus sp.</i> , and <i>Pyrus sp.</i> ) |                      |                      |                  |                                                                                                    |                 |
| 7018499                                                                     | 23,5                 | 4,8                  | 7,4              | at a height of 0.5 meters, a 50-centimeter decayed hollow                                          | 84,5            |
| 7018521                                                                     | 13,8                 | 4,8                  | 6,6              | broken branches                                                                                    | 72,7            |
| 7060835                                                                     | 11,8                 | 3,3                  | 4,9              | almost completely dry                                                                              | 90,0            |
| 7060898                                                                     | 20,3                 | 4,5                  | 6,8              | tree inclined                                                                                      | 87,5            |
| 7060899                                                                     | 17,3                 | 4,3                  | 6,3              | a decaying tree                                                                                    | 77,1            |
| <i>Populus sp.</i>                                                          |                      |                      |                  |                                                                                                    |                 |
| 7043836                                                                     | 19,8                 | 11,9                 | 17,4             | rickety tree, broken and dry branches                                                              | 85,0            |
| 7043945                                                                     | 21,8                 | 11,1                 | 16,8             | dry tree                                                                                           | 100,0           |
| 7044078                                                                     | 26,5                 | 11,0                 | 15,5             | slightly bent, broken branches                                                                     | 79,9            |
| 7044084                                                                     | 30,3                 | 11,5                 | 15,9             | broken and dry branches                                                                            | 69,6            |
| 7044086                                                                     | 29,0                 | 12,2                 | 16,3             | trunks intersect with each other                                                                   | 71,4            |
| 7049180                                                                     | 10,3                 | 12,1                 | 17,7             | Tree inclined                                                                                      | 69,5            |

**Table S1.** Health condition characteristic of selected defoliated trees in Bielański Forest in Warsaw (part 2)

| tree ID (Nr from Tree Crown Map for Warsaw) | crown tree area (m2) | tree hight (average) | tree hight (max) | ill tree characteristic                                  | defoliation (%) |
|---------------------------------------------|----------------------|----------------------|------------------|----------------------------------------------------------|-----------------|
| <i>Populus sp.</i>                          |                      |                      |                  |                                                          |                 |
| 7057897                                     | 16,0                 | 20,0                 | 22,8             | broken or dry branches                                   | 71,9            |
| 7062435                                     | 11,5                 | 17,5                 | 25,6             | rickety tree                                             | 75,0            |
| 7062504                                     | 10,3                 | 23,7                 | 26,1             | broken and dry branches                                  | 65,0            |
| 7067808                                     | 20,3                 | 15,7                 | 22,9             | cracks on the trunk                                      | 89,5            |
| 7068300                                     | 13,0                 | 16,8                 | 19,8             | dry tree                                                 | 100,0           |
| 7069119                                     | 22,8                 | 15,7                 | 25,3             | dry tree                                                 | 100,0           |
| 7070536                                     | 22,5                 | 15,3                 | 24,1             | split at the base of the trunk at a height of 1.5 meters | 83,0            |
| 7072382                                     | 28,5                 | 18,7                 | 24,9             | Tree inclined, broken and dry branches                   | 70,5            |
| 7075048                                     | 13,3                 | 15,2                 | 23,4             | Tree inclined, broken and dry branches                   | 69,8            |
| 7075674                                     | 12,0                 | 14,0                 | 18,6             | Tree inclined, broken branches                           | 81,4            |
| 7075898                                     | 9,5                  | 19,0                 | 25,0             | broken and dry branches                                  | 83,0            |
| 7078578                                     | 36,8                 | 26,0                 | 30,9             | slightly bent tree                                       | 68,3            |
| 7079477                                     | 21,3                 | 23,1                 | 28,5             | roots growing around the trunk                           | 66,6            |
| 7079482                                     | 16,8                 | 21,2                 | 27,6             | slightly bent tree                                       | 69,5            |
| 7079485                                     | 18,8                 | 20,9                 | 27,1             | a thinning tree, broken branches                         | 71,2            |
| 7079983                                     | 12,0                 | 21,9                 | 24,7             | broken conductor at a height of 7 meters                 | 83,2            |
| 7080273                                     | 18,0                 | 17,9                 | 23,2             | a decaying tree, broken branches                         | 75,2            |
| 7080318                                     | 15,3                 | 25,0                 | 29,1             | broken and dry branches                                  | 89,7            |
| 7080328                                     | 25,0                 | 21,7                 | 27,5             | cracks on the trunk                                      | 70,6            |
| 7080332                                     | 30,3                 | 17,1                 | 25,9             | split at the base of the trunk, broken branches          | 75,8            |
| 7081141                                     | 10,5                 | 12,3                 | 15,4             | a bulky growth on the trunk                              | 83,4            |
| 7083307                                     | 7,8                  | 20,3                 | 21,0             | dry tree                                                 | 100,0           |
| 7083418                                     | 19,8                 | 17,2                 | 22,5             | broken or dry branches                                   | 71,2            |
| 7089234                                     | 17,5                 | 23,5                 | 26,6             | dry tree, broken branches                                | 100,0           |
| 7090102                                     | 9,0                  | 17,2                 | 22,3             | rickety tree                                             | 81,1            |
| 7096611                                     | 22,8                 | 19,3                 | 22,0             | a bulky growth on the trunk                              | 88,2            |
| 7097106                                     | 22,3                 | 19,9                 | 25,3             | a hollow had risen at the base of the trunk              | 81,0            |
| 7101289                                     | 26,0                 | 10,8                 | 21,3             | dry tree, broken branches                                | 100,0           |
| 7101386                                     | 28,5                 | 14,8                 | 22,4             | broken branches                                          | 87,4            |
| 7101585                                     | 5,8                  | 4,0                  | 5,8              | roots growing around the trunk                           | 76,5            |
| 7102323                                     | 10,3                 | 21,3                 | 26,0             | broken and dry branches                                  | 70,5            |
| 7102417                                     | 66,0                 | 14,5                 | 21,6             | roots growing around the trunk                           | 69,3            |
| 7102425                                     | 39,5                 | 10,2                 | 18,5             | broken branches                                          | 71,9            |
| 7102428                                     | 20,0                 | 13,5                 | 18,3             | Tree inclined                                            | 80,6            |
| 7103863                                     | 21,8                 | 11,5                 | 20,2             | rickety tree, broken and dry branches                    | 73,6            |
| 7103864                                     | 13,5                 | 12,3                 | 18,3             | broken and dry branches                                  | 78,3            |
| 7108891                                     | 31,0                 | 22,5                 | 25,8             | Tree inclined, broken branches                           | 83,3            |
| 7108904                                     | 43,8                 | 21,0                 | 25,0             | rickety tree, broken branches                            | 80,5            |
| 7109383                                     | 22,0                 | 16,0                 | 22,4             | Tree inclined                                            | 70,7            |
| 7111410                                     | 12,8                 | 19,7                 | 22,8             | broken and dry branches                                  | 73,4            |
| 7112464                                     | 16,0                 | 18,0                 | 22,1             | a decaying tree, broken branches                         | 71,7            |
| 7112703                                     | 16,8                 | 18,9                 | 23,6             | roots growing around the trunk                           | 70,2            |
| 7114871                                     | 20,8                 | 22,6                 | 27,0             | rickety tree, broken and dry branches                    | 95,9            |
| <i>Salix sp.</i>                            |                      |                      |                  |                                                          |                 |
| 7043814                                     | 10,8                 | 14,4                 | 18,6             | dry tree                                                 | 100,0           |
| 7092558                                     | 29,3                 | 11,4                 | 14,8             | a thining tree                                           | 75,4            |
